# Supplementary material for: Targeted delivery of Chil3/Chil4 siRNA to alveolar macrophages using ternary complexes composed of HMG and oligoarginine micelles
Source: Royal Society of Chemistry journal article supplement (doi:10.1039/c9nr06382j), 2019-11-27
Supplement: c9nr06382j4.pdf [file c9nr06382j4.pdf]

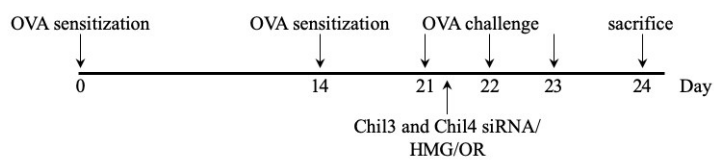

**Supplement Fig 1.**

Supplement Fig 1. Schematic protocol for ovalbumin(OVA) sensitization and siRNA treatment. The BALB/c mice were sensitized with OVA and treated with Chil3 and Chil4 siRNA/HMG/OR complex. IP, intraperitoneal; IN, intranasal; IT, intratracheal treated.

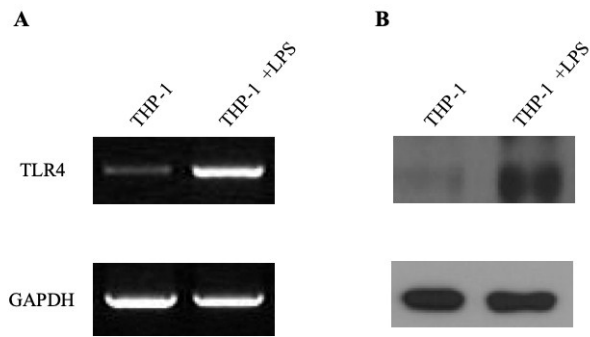

Supplement fig 2.

Supplement Fig 2. TLR4 expression in THP-1 cells after LPS treatment.

A, Semi-quantitative RT-PCR of TLR4 in THP-1 cells. B, Western blot analysis of TLR4. GAPDH was used as an internal control. GAPDH, glyceraldehyde-3-phosphate dehydrogenase;
