# Supplementary figures and images for: Targeted delivery of Chil3/Chil4 siRNA to alveolar macrophages using ternary complexes composed of HMG and oligoarginine micelles
Source: Royal Society of Chemistry journal article supplement (doi:10.1039/c9nr06382j), 2019-11-27

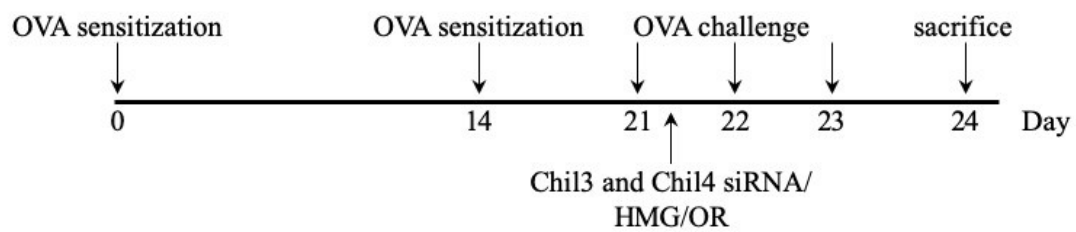

**Supplement Fig 1.**

Supplement: c9nr06382j2.pdf [file c9nr06382j2.pdf]

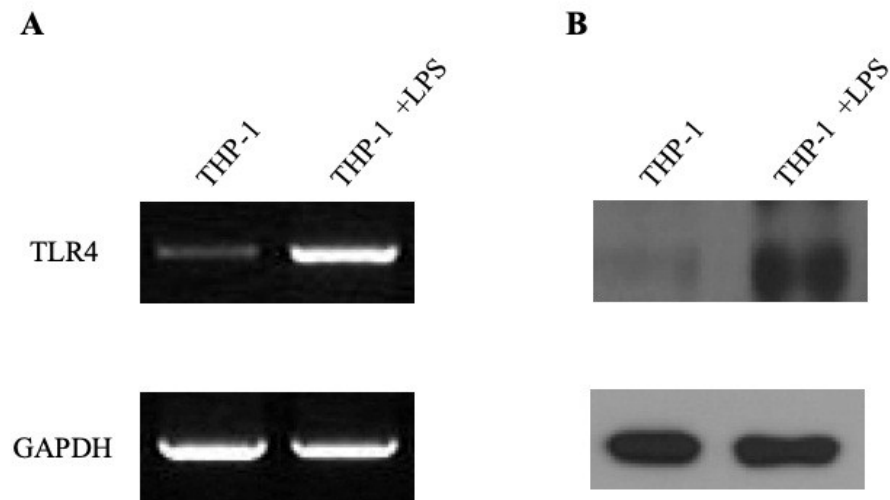

Supplement fig 2.

Supplement: c9nr06382j3.pdf [file c9nr06382j3.pdf]
